# Supplementary material for: Integrated transcriptomics, proteomics and metabolomics to identify biomarkers of astragaloside IV against cerebral ischemic injury in rats
Source: Royal Society of Chemistry journal article supplement (doi:10.1039/d2fo03030f), 2023-01-01
Supplement: d2fo03030f1.xlsx [file d2fo03030f1.xlsx]

## Sheet: Sheet1
Table S1. Up-regulated gene
Uniprot.ID	Entrez	Symbol	Name
A0A096MIZ1	103692368	Palm2	paralemmin 2
A0A096MJZ2	686610	Tbl2	transducin (beta)-like 2
A0A0G2JSG6	24184	Ak2	adenylate kinase 2
A0A0G2JSK5	24511	Itgb1	integrin subunit beta 1
A0A0G2JSL4	24855	Tsc2	TSC complex subunit 2
A0A0G2JSY2	25403	Cast	calpastatin
A0A0G2JTN4	287420	Pfas	phosphoribosylformylglycinamidine synthase
A0A0G2JVE6	81641	Anpep	"alanyl aminopeptidase, membrane"
A0A0G2JWA8	362587	Macf1	microtubule-actin crosslinking factor 1
A0A0G2JWK2	29386	Mecp2	methyl CpG binding protein 2
A0A0G2JXG3	300857	Tmem30a	transmembrane protein 30A
A0A0G2JY22	300231	Dip2b	disco-interacting protein 2 homolog B
A0A0G2JYR1	500233	Exoc6b	exocyst complex component 6B
A0A0G2JYT1	266806	Erc1	ELKS/RAB6-interacting/CAST family member 1
A0A0G2K038	300689	Rexo2	RNA exonuclease 2
A0A0G2K1L0	116640	Tnc	tenascin C
A0A0G2K1U9	292708	Irgq	immunity-related GTPase Q
A0A0G2K3L8	301549	Wdfy1	WD repeat and FYVE domain containing 1
A0A0G2K464	65171	Scamp5	secretory carrier membrane protein 5
A0A0G2K502	307270	Me2	malic enzyme 2
A0A0G2K654	684681	H1f2	"H1.2 linker histone, cluster member"
A0A0G2K6G2	366227	Apmap	adipocyte plasma membrane associated protein
A0A0G2K6S9	24582	Myh11	myosin heavy chain 11
A0A0G2K7R8	85254	Slc44a1	solute carrier family 44 member 1
A0A0G2K8P3	25489	Nedd4	NEDD4 E3 ubiquitin protein ligase
A0A0G2K8S6	103692171	LOC103692171	mannosyl-oligosaccharide glucosidase
A0A0G2K9I6	24268	Cp	ceruloplasmin
A0A0G2K9J0	303599	Tanc2	"tetratricopeptide repeat, ankyrin repeat and coiled-coil containing 2"
A0A0G2QC04	315926	Pls1	plastin 1
A0A0G2QC33	316640	Atg4b	"autophagy related 4B, cysteine peptidase"
A0A0H2UHD9	314648	Ncln	nicalin
A0A0H2UI21	311849	Crat	carnitine O-acetyltransferase
A0A0U1RRV5	303300	Cluh	clustered mitochondria homolog
A0A140TAB4	29384	Macroh2a1	macroH2A.1 histone
A0A140TAF0	117557	Tpm3	tropomyosin 3
A0A140UHX6	314251	Sptb	"spectrin, beta, erythrocytic"
A1L1J8	288779	Rab5b	"RAB5B, member RAS oncogene family"
A2VD12	310644	Pbxip1	PBX homeobox interacting protein 1
A4GW50	691337	Stk38l	serine/threonine kinase 38 like
B0BMY7	684352	Twf2	twinfilin actin-binding protein 2
B0BN81	25538	Rps5	ribosomal protein S5
B0BN99	305373	Hmgb3	high mobility group box 3
B0BNJ1	683667	Sri	sorcin
B1H241	293614	Ric8a	RIC8 guanine nucleotide exchange factor A
B1H267	296199	Snx5	sorting nexin 5
B1H2A6	287433	Fxr2	FMR1 autosomal homolog 2
B1PLB2	305081	Cd34	CD34 molecule
B1WBY1	362356	Cul1	cullin 1
B1WC02	313560	Ctps1	CTP synthase 1
B2GUZ5	691149	Capza1	capping actin protein of muscle Z-line subunit alpha 1
B2GV24	313115	Ufl1	Ufm1-specific ligase 1
B2RYI2	363707	Srp68	signal recognition particle 68
B2RYP3	689997	Fam91a1	"family with sequence similarity 91, member A1"
B2RYT7	688746	Hdhd3	haloacid dehalogenase-like hydrolase domain containing 3
B4F7E8	362115	Niban2	niban apoptosis regulator 2
B5DEG8	685144	Sec24c	"SEC24 homolog C, COPII coat complex component"
B5DEJ1	360840	Srgap2	SLIT-ROBO Rho GTPase activating protein 2
B5DEX3	362988	Cpne8	copine 8
B5DEY8	362738	Snx6	sorting nexin 6
B5DFC8	293484	Eif3c	"eukaryotic translation initiation factor 3, subunit C"
C0JPT7	293860	Flna	filamin A
D3Z8V4	315348	Nckap1l	NCK associated protein 1 like
D3Z9C0	362324	Mios	meiosis regulator for oocyte development
D3ZAZ1	287746	Fmnl1	formin-like 1
D3ZB30	29497	Ptbp1	polypyrimidine tract binding protein 1
D3ZCI0	79223	Gk	glycerol kinase
D3ZD73	500988	Ddx6	DEAD-box helicase 6
D3ZDX5	316009	Plxnb1	plexin B1
D3ZFU9	288057	Mylk	myosin light chain kinase
D3ZHG8	360658	Gga3	"golgi associated, gamma adaptin ear containing, ARF binding protein 3"
D3ZI07	296284	Kif3b	kinesin family member 3B
D3ZII1	363231	Rftn2	raftlin family member 2
D3ZIL9	367307	Dis3l2	DIS3-like 3'-5' exoribonuclease 2
D3ZK56	302495	Rap2c	"RAP2C, member of RAS oncogene family"
D3ZK73	302502	Cul4b	cullin 4B
D3ZLC1	299625	Lmnb2	lamin B2
D3ZLD5	312077	Golga3	golgin A3
D3ZM69	309557	Epb41l2	erythrocyte membrane protein band 4.1-like 2
D3ZMY7	100363253	Nt5c2	"5'-nucleotidase, cytosolic II"
D3ZN27	363127	Dnajc13	DnaJ heat shock protein family (Hsp40) member C13
D3ZQ57	315217	Plxnb2	plexin B2
D3ZQP6	315711	Sema7a	semaphorin 7A (John Milton Hagen blood group)
D3ZTX0	252889	Tmed7	transmembrane p24 trafficking protein 7
D3ZUF9	307081	Pitrm1	pitrilysin metallopeptidase 1
D3ZUM2	287545	Sarm1	sterile alpha and TIR motif containing 1
D3ZUM4	316033	Glb1	"galactosidase, beta 1"
D3ZUP5	679934	Brk1	BRICK1 subunit of SCAR/WAVE actin nucleating complex
D3ZVQ0	297593	Usp5	ubiquitin specific peptidase 5
D3ZVU6	312371	Avl9	AVL9 cell migration associated
D3ZW15	295461	Sec24b	"SEC24 homolog B, COPII coat complex component"
D3ZWP6	289392	Plxna2	plexin A2
D3ZX42	311911	Rabgap1	RAB GTPase activating protein 1
D3ZXA6	307852	Pdpr	pyruvate dehydrogenase phosphatase regulatory subunit
D3ZXD2	303638	Abca8a	"ATP-binding cassette, subfamily A (ABC1), member 8a"
D3ZYJ5	300644	Gramd1b	GRAM domain containing 1B
D3ZYS7	171092	G3bp1	G3BP stress granule assembly factor 1
D3ZZ62	314879	Xpot	exportin for tRNA
D3ZZL9	309798	Gcc2	GRIP and coiled-coil domain containing 2
D3ZZZ9	311163	Ctnnd1	catenin delta 1
D4A022	311880	Gapvd1	GTPase activating protein and VPS9 domains 1
D4A060	298033	Snx30	sorting nexin family member 30
D4A1J6	303292	Ankfy1	ankyrin repeat and FYVE domain containing 1
D4A1Q9	300105	Ttll12	tubulin tyrosine ligase like 12
D4A2N2	362590	Inpp5b	inositol polyphosphate-5-phosphatase B
D4A2Z6	309858	Sec63	"SEC63 homolog, protein translocation regulator"
D4A362	305464	Depdc5	"DEP domain containing 5, GATOR1 subcomplex subunit"
D4A3P1	310633	Ubqln4	ubiquilin 4
D4A4H5	287470	Sdf2	stromal cell derived factor 2
D4A4Z9	361029	Ktn1	kinectin 1
D4A626	299285	Clmn	calmin
D4A631	312915	Arfgef1	ADP ribosylation factor guanine nucleotide exchange factor 1
D4A719	363478	Snx12	sorting nexin 12
D4A769	308473	Samd4b	sterile alpha motif domain containing 4B
D4A7U1	114636	Zyx	zyxin
D4A8D5	306204	Flnb	filamin B
D4A962	361522	Hnrnpul1	heterogeneous nuclear ribonucleoprotein U-like 1
D4A9D8	365410	Osbp	oxysterol binding protein
D4AB66	314349	Ston2	stonin 2
D4AC36	293427	Eif3f	"eukaryotic translation initiation factor 3, subunit F"
D4ACG2	362843	Ilvbl	ilvB acetolactate synthase like
D4AD15	287986	Eif4g1	"eukaryotic translation initiation factor 4 gamma, 1"
D4ADD3	316395	Hecw2	"HECT, C2 and WW domain containing E3 ubiquitin protein ligase 2"
D4ADE5	689954	Setd7	"SET domain containing 7, histone lysine methyltransferase"
D4ADG2	363611	Iba57	iron-sulfur cluster assembly factor IBA57
D4AEH9	362029	Agl	"amylo-alpha-1, 6-glucosidase, 4-alpha-glucanotransferase"
E2RUH2	100360501	Rnh1	ribonuclease/angiogenin inhibitor 1
E9PT66	292019	Sf3b3	"splicing factor 3b, subunit 3"
E9PTE1	304092	Son	Son DNA binding protein
F1LM66	287739	Eftud2	elongation factor Tu GTP binding domain containing 2
F1LPK7	81748	Pls3	plastin 3
F1LQL1	24598	Nos1	nitric oxide synthase 1
F1LQP9	309126	Tnpo1	transportin 1
F1LRI7	500244	Aak1	AP2 associated kinase 1
F1LRL4	360520	Tbc1d9b	TBC1 domain family member 9B
F1LSG8	312083	Vps50	VPS50 subunit of EARP/GARPII complex
F1LSM0	313427	Usp24	ubiquitin specific peptidase 24
F1LT49	362672	Lrrc47	leucine rich repeat containing 47
F1LVZ9	313525	Hectd3	HECT domain E3 ubiquitin protein ligase 3
F1LYQ8	306183	Farp1	"FERM, ARH/RhoGEF and pleckstrin domain protein 1"
F1LYZ8	362697	Ppp1r21	"protein phosphatase 1, regulatory subunit 21"
F1LZ38	308831	Tenm4	teneurin transmembrane protein 4
F1M0U5	690073	Nbas	NBAS subunit of NRZ tethering complex
F1M1B3	362919	Washc5	WASH complex subunit 5
F1M3P6	690538	Scai	suppressor of cancer cell invasion
F1M4A0	292994	Tjp1	tight junction protein 1
F1M853	311483	Rrbp1	ribosome binding protein 1
F1M8X9	309451	Gbf1	golgi brefeldin A resistant guanine nucleotide exchange factor 1
F1M957	116669	Vwf	von Willebrand factor
F1MA89	361261	Ccny	cyclin Y
F1MAA1	308896	Usp47	ubiquitin specific peptidase 47
F1MAA7	117036	Lamc1	laminin subunit gamma 1
F1MAB9	294900	Tpd52	tumor protein D52
F7EZ89	366896	Tbc1d15	"TBC1 domain family, member 15"
F7F3I7	310630	Sema4a	semaphorin 4A
G3V631	360797	Rabgef1	RAB guanine nucleotide exchange factor 1
G3V6G7	360992	Pnpt1	polyribonucleotide nucleotidyltransferase 1
G3V6I1	54265	Llgl1	LLGL scribble cell polarity complex component 1
G3V6Q9	140610	Brinp1	BMP/retinoic acid inducible neural specific 1
G3V6R7	289934	Oxsm	"3-oxoacyl-ACP synthase, mitochondrial"
G3V758	25356	Cntn2	contactin 2
G3V7G9	300069	Eif3l	"eukaryotic translation initiation factor 3, subunit L"
G3V7N6	103689982	Mboat7l1	membrane bound O-acyltransferase domain containing 7-like 1
G3V7T6	84486	Sf3b1	"splicing factor 3b, subunit 1"
G3V824	25151	Igf2r	insulin-like growth factor 2 receptor
G3V836	24854	Clu	clusterin
G3V852	313494	Tln1	talin 1
G3V8F9	25284	Amacr	alpha-methylacyl-CoA racemase
G3V8L3	60374	Lmna	lamin A/C
G3V8L9	287710	Cavin1	caveolae associated protein 1
G3V8R1	59295	Nucb2	nucleobindin 2
G3V8R2	58982	Ncan	neurocan
G3V8T4	64470	Ddb1	damage-specific DNA binding protein 1
G3V8V1	29143	Grn	granulin precursor
G3V8Y8	192154	Hip1	huntingtin interacting protein 1
G3V928	299858	Lrp1	LDL receptor related protein 1
G3V982	362271	Elmo2	engulfment and cell motility 2
G3V9C0	100360754	LOC100360754	"histone cluster 1, H2ae-like"
G3V9D3	314352	Sel1l	SEL1L adaptor subunit of ERAD E3 ubiquitin ligase
G3V9K0	293638	Cars	cysteinyl-tRNA synthetase
G3V9N0	298510	Pabpc4	"poly(A) binding protein, cytoplasmic 4"
G3V9N7	311187	Pacsin3	protein kinase C and casein kinase substrate in neurons 3
G3V9P7	29424	Htt	huntingtin
G3V9R0	360503	Luc7l	LUC7-like
G3V9U1	316611	Agap1	"ArfGAP with GTPase domain, ankyrin repeat and PH domain 1"
M0R544	367562	Gaa	"glucosidase, alpha, acid"
M0R5U4	302950	Adcy9	adenylate cyclase 9
M0R6T4	171124	Mms19	"MMS19 homolog, cytosolic iron-sulfur assembly component"
M0RAE4	363332	Ubxn6	UBX domain protein 6
M0RBF1	24232	C3	complement C3
M0RBS9	260323	Snx27	sorting nexin 27
M0RDJ3	54287	Eif2ak2	eukaryotic translation initiation factor 2-alpha kinase 2
M3ZCQ2	296126	Snrnp200	small nuclear ribonucleoprotein U5 subunit 200
O08623	113894	Sqstm1	sequestosome 1
O35077	60666	Gpd1	glycerol-3-phosphate dehydrogenase 1
O35142	60384	Copb2	COPI coat complex subunit beta 2
O35567	81643	Atic	5-aminoimidazole-4-carboxamide ribonucleotide formyltransferase/IMP cyclohydrolase
O54783	29367	Chkb	choline kinase beta
O88339	117277	Epn1	Epsin 1
O88763	65052	Pik3c3	"phosphatidylinositol 3-kinase, catalytic subunit type 3"
O88794	64533	Pnpo	pyridoxamine 5'-phosphate oxidase
P00388	29441	Por	cytochrome p450 oxidoreductase
P01041	25308	Cstb	cystatin B
P02803	24567	Mt1	metallothionein 1
P04177	25085	Th	tyrosine hydroxylase
P04355	689415	Mt2A	metallothionein 2A
P04762	24248	Cat	catalase
P04785	25506	P4hb	prolyl 4-hydroxylase subunit beta
P05370	24377	G6pd	glucose-6-phosphate dehydrogenase
P05943	81778	S100a10	S100 calcium binding protein A10
P07151	24223	B2m	beta-2 microglobulin
P07872	50681	Acox1	acyl-CoA oxidase 1
P09330	24689	Prps2	phosphoribosyl pyrophosphate synthetase 2
P0C0R5	363131	Pik3r4	"phosphoinositide-3-kinase, regulatory subunit 4"
P10960	25524	Psap	prosaposin
P11348	64192	Qdpr	quinoid dihydropteridine reductase
P11497	60581	Acaca	acetyl-CoA carboxylase alpha
P11654	58958	Nup210	nucleoporin 210
P11762	56646	Lgals1	galectin 1
P14659	60460	Hspa2	heat shock protein family A (Hsp70) member 2
P14669	25291	Anxa3	annexin A3
P14841	25307	Cst3	cystatin C
P15650	25287	Acadl	"acyl-CoA dehydrogenase, long chain"
P18297	29270	Spr	sepiapterin reductase
P19468	25283	Gclc	"glutamate-cysteine ligase, catalytic subunit"
P19836	140544	Pcyt1a	"phosphate cytidylyltransferase 1, choline, alpha"
P19945	64205	Rplp0	ribosomal protein lateral stalk subunit P0
P20070	25035	Cyb5r3	cytochrome b5 reductase 3
P20650	24666	Ppm1a	"protein phosphatase, Mg2+/Mn2+ dependent, 1A"
P21531	300079	Rpl3	ribosomal protein L3
P21533	117042	Rpl6	ribosomal protein L6
P23514	114023	Copb1	COPI coat complex subunit beta 1
P27867	24788	Sord	sorbitol dehydrogenase
P31016	29495	Dlg4	discs large MAGUK scaffold protein 4
P31422	24416	Grm3	glutamate metabotropic receptor 3
P35559	25700	Ide	insulin degrading enzyme
P36860	116546	Ralb	RAS like proto-oncogene B
P36972	292072	Aprt	adenine phosphoribosyl transferase
P40241	24936	Cd9	CD9 molecule
P47819	24387	Gfap	glial fibrillary acidic protein
P50430	25227	Arsb	arylsulfatase B
P51607	81759	Renbp	renin binding protein
P52296	24917	Kpnb1	karyopherin subunit beta 1
P52631	25125	Stat3	signal transducer and activator of transcription 3
P54319	116645	Plaa	"phospholipase A2, activating protein"
P54748	25638	Pde4a	phosphodiesterase 4A
P55051	80841	Fabp7	fatty acid binding protein 7
P55053	140868	Fabp5	fatty acid binding protein 5
P57097	65037	Mertk	"MER proto-oncogene, tyrosine kinase"
P60892	29562	Prps1	phosphoribosyl pyrophosphate synthetase 1
P62168	65153	Ncs1	neuronal calcium sensor 1
P62278	161477	Rps13	ribosomal protein S13
P62804	100912489	LOC100912489	histone H4-like
P62919	100360117	LOC100360117	ribosomal protein L8-like
P63142	25468	Kcna2	potassium voltage-gated channel subfamily A member 2
P63259	100361457	LOC100361457	"actin, gamma 1 propeptide-like"
P68182	293508	Prkacb	protein kinase cAMP-activated catalytic subunit beta
P70566	58814	Tmod2	tropomodulin 2
P85973	290029	Pnp	purine nucleoside phosphorylase
P86182	317381	Ccdc22	coiled-coil domain containing 22
P97519	79238	Hmgcl	3-hydroxy-3-methylglutaryl-CoA lyase
P97608	116684	Oplah	5-oxoprolinase (ATP-hydrolysing)
P97829	29364	Cd47	Cd47 molecule
Q05683	24380	Gad2	glutamate decarboxylase 2
Q07936	56611	Anxa2	annexin A2
Q10743	29650	Adam10	ADAM metallopeptidase domain 10
Q1EG89	360820	Pxn	paxillin
Q32KJ5	100909505	LOC100909505	N-acetylglucosamine-6-sulfatase-like
Q32PX6	308875	Rhog	ras homolog family member G
Q3ZB99	115769	Tjp2	tight junction protein 2
Q400C7	360650	Amz2	archaelysin family metallopeptidase 2
Q4AEF8	297428	Copg1	COPI coat complex subunit gamma 1
Q4FZY0	298609	Efhd2	"EF-hand domain family, member D2"
Q4G061	288516	Eif3b	"eukaryotic translation initiation factor 3, subunit B"
Q4KLZ3	362836	Dazap1	DAZ associated protein 1
Q4KLZ6	361730	Tkfc	triokinase and FMN cyclase
Q4KMA2	298012	Rad23b	"RAD23 homolog B, nucleotide excision repair protein"
Q4KMA8	80897	Erap1	endoplasmic reticulum aminopeptidase 1
Q4QQS7	288051	Umps	uridine monophosphate synthetase
Q4V7C6	295088	Gmps	guanine monophosphate synthase
Q4V8E2	311078	Psmd14	"proteasome 26S subunit, non-ATPase 14"
Q4V8F9	313200	Hsdl2	hydroxysteroid dehydrogenase like 2
Q4VSI4	360471	Usp7	ubiquitin specific peptidase 7
Q505J8	288917	Farsa	phenylalanyl-tRNA synthetase subunit alpha
Q5BJS6	360698	Tmem50b	transmembrane protein 50B
Q5D006	408217	Usp11	ubiquitin specific peptidase 11
Q5EB62	291709	Slc25a46	"solute carrier family 25, member 46"
Q5I0F0	305470	Drg1	developmentally regulated GTP binding protein 1
Q5M7V8	313591	Thrap3	thyroid hormone receptor associated protein 3
Q5M821	314897	Ppm1h	"protein phosphatase, Mg2+/Mn2+ dependent, 1H"
Q5M9G9	360977	Tbrg4	transforming growth factor beta regulator 4
Q5PQN1	309758	Herc4	HECT and RLD domain containing E3 ubiquitin protein ligase 4
Q5QD51	83425	Akap12	A-kinase anchoring protein 12
Q5RJR2	315265	Twf1	twinfilin actin-binding protein 1
Q5RKH2	287835	Galk1	galactokinase 1
Q5U2Q7	307503	Etf1	eukaryotic translation termination factor 1
Q5U2U0	300786	Clpx	caseinolytic mitochondrial matrix peptidase chaperone subunit X
Q5U2Y7	301549	Wdfy1	WD repeat and FYVE domain containing 1
Q5U302	307505	Ctnna1	catenin alpha 1
Q5U318	364052	Pea15	proliferation and apoptosis adaptor protein 15
Q5U362	79124	Anxa4	annexin A4
Q5VLR5	298066	Erp44	endoplasmic reticulum protein 44
Q5XFX0	304983	Tagln2	transgelin 2
Q5XI38	306071	Lcp1	lymphocyte cytosolic protein 1
Q5XIA5	287711	Coasy	Coenzyme A synthase
Q5XIC0	291075	Eci2	enoyl-CoA delta isomerase 2
Q5XID1	307649	Ciapin1	cytokine induced apoptosis inhibitor 1
Q5XIN4	282584	Mtmr9	myotubularin related protein 9
Q5XIN6	305457	Letm1	leucine zipper and EF-hand containing transmembrane protein 1
Q62720	58976	Slc30a1	solute carrier family 30 member 1
Q62733	25359	Tmpo	thymopoietin
Q62824	116654	Exoc4	exocyst complex component 4
Q62826	116655	Hnrnpm	heterogeneous nuclear ribonucleoprotein M
Q62844	25150	Fyn	"FYN proto-oncogene, Src family tyrosine kinase"
Q62920	64353	Pdlim5	PDZ and LIM domain 5
Q63228	81661	Gmfb	"glia maturation factor, beta"
Q63357	25485	Myo1d	myosin ID
Q63524	65165	Tmed2	transmembrane p24 trafficking protein 2
Q63584	84599	Tmed10	transmembrane p24 trafficking protein 10
Q63604	25054	Ntrk2	neurotrophic receptor tyrosine kinase 2
Q63610	117557	Tpm3	tropomyosin 3
Q63639	116676	Aldh1a2	"aldehyde dehydrogenase 1 family, member A2"
Q641X3	300757	Hexa	hexosaminidase subunit alpha
Q641X8	NA	NA	NA
Q641Y5	312647	Atg7	autophagy related 7
Q642A9	296159	Vps16	VPS16 core subunit of CORVET and HOPS complexes
Q64611	60356	Csad	cysteine sulfinic acid decarboxylase
Q66H41	310815	Snx7	sorting nexin 7
Q66H61	290868	Qars1	glutaminyl-tRNA synthetase 1
Q66H71	302890	Cpped1	calcineurin-like phosphoesterase domain containing 1
Q66H91	304546	Git2	GIT ArfGAP 2
Q66HA6	500282	Arl8b	ADP-ribosylation factor like GTPase 8B
Q66HD3	298441	Nasp	nuclear autoantigenic sperm protein
Q66HG9	311430	Mavs	mitochondrial antiviral signaling protein
Q66HL7	59075	Grk5	G protein-coupled receptor kinase 5
Q68FP1	296654	Gsn	gelsolin
Q68FR2	366988	Bin2	bridging integrator 2
Q68FS4	289668	Lap3	leucine aminopeptidase 3
Q68FS8	295395	Rtca	RNA 3'-terminal phosphate cyclase
Q68FT7	301544	Farsb	phenylalanyl-tRNA synthetase subunit beta
Q68FX1	300741	Mpi	mannose phosphate isomerase
Q68FZ8	24624	Pccb	propionyl-CoA carboxylase subunit beta
Q6AXR4	294673	Hexb	hexosaminidase subunit beta
Q6AXX5	362757	Rdh11	retinol dehydrogenase 11
Q6AYB5	116650	Srp54a	signal recognition particle 54A
Q6AYE2	292156	Sh3glb1	SH3 domain -containing GRB2-like endophilin B1
Q6GMM8	94172	Slc27a1	solute carrier family 27 member 1
Q6GQP4	246324	Rab31	"RAB31, member RAS oncogene family"
Q6IMX3	64304	Acads	acyl-CoA dehydrogenase short chain
Q6IN22	64529	Ctsb	cathepsin B
Q6IN39	79244	Hsd17b4	hydroxysteroid (17-beta) dehydrogenase 4
Q6IRG9	171126	Ap3m1	adaptor related protein complex 3 subunit mu 1
Q6IRK9	58952	Cpq	carboxypeptidase Q
Q6P0K8	81679	Jup	junction plakoglobin
Q6P136	192235	Hyou1	hypoxia up-regulated 1
Q6P6Q5	54226	App	amyloid beta precursor protein
Q6P6T6	171293	Ctsd	cathepsin D
Q6P747	313647	Hp1bp3	"heterochromatin protein 1, binding protein 3"
Q6P756	298598	Necap2	NECAP endocytosis associated 2
Q6P7B0	314442	Wars1	tryptophanyl-tRNA synthetase 1
Q6P7S1	84431	Asah1	N-acylsphingosine amidohydrolase 1
Q6P9V1	25621	Cd81	Cd81 molecule
Q6P9V7	29630	Psme1	proteasome activator subunit 1
Q6Q0N1	291394	Cndp2	carnosine dipeptidase 2
Q6Q7Y5	303634	Gna13	G protein subunit alpha 13
Q711G3	298917	Iah1	isoamyl acetate hydrolyzing esterase 1
Q71SY3	60381	Tsn	translin
Q78PB6	170845	Ndel1	nudE neurodevelopment protein 1-like 1
Q7TPH3	24907	Dmd	dystrophin
Q7TSU1	296380	Arfgef2	ADP ribosylation factor guanine nucleotide exchange factor 2
Q7TT49	113960	Cdc42bpb	CDC42 binding protein kinase beta
Q80W92	307842	Vac14	VAC14 component of PIKFYVE complex
Q8CF97	286761	Vcpip1	valosin containing protein interacting protein 1
Q8CFG5	306243	Cacna2d3	calcium voltage-gated channel auxiliary subunit alpha2delta 3
Q8R3Z7	192204	Ehd4	EH-domain containing 4
Q91Y81	117515	Septin2	septin 2
Q920A6	114861	Scpep1	serine carboxypeptidase 1
Q923W4	252941	Hdgfl3	HDGF like 3
Q99J82	170922	Ilk	integrin-linked kinase
Q99PJ8	170955	Zfp483	zinc finger protein 483
Q99PV2	114095	Stxbp3	syntaxin binding protein 3
Q9EPB1	83799	Dpp7	dipeptidylpeptidase 7
Q9EPH8	171350	Pabpc1	"poly(A) binding protein, cytoplasmic 1"
Q9EQS4	103691744	LOC103691744	cystathionine gamma-lyase
Q9ES21	116482	Sacm1l	SAC1 like phosphatidylinositide phosphatase
Q9EST6	170724	Anp32b	acidic nuclear phosphoprotein 32 family member B
Q9JHL4	83527	Dbnl	drebrin-like
Q9JLA3	171129	Uggt1	UDP-glucose glycoprotein glucosyltransferase 1
Q9QX80	103689931	LOC103689931	heterogeneous nuclear ribonucleoprotein A/B
Q9QYJ2	29372	Rasa3	RAS p21 protein activator 3
Q9R1T3	252929	Ctsz	cathepsin Z
Q9WV48	78957	Shank1	SH3 and multiple ankyrin repeat domains 1
Q9WVI4	66012	Gucy1a2	guanylate cyclase 1 soluble subunit alpha 2
Q9WVR7	287931	Ppm1f	"protein phosphatase, Mg2+/Mn2+ dependent, 1F"
Q9Z0J8	59318	Negr1	neuronal growth regulator 1
Q9Z0V5	85274	Prdx4	peroxiredoxin 4
Q9Z269	60431	Vapb	VAMP associated protein B and C
