# Supplementary material for: Integrated transcriptomics, proteomics and metabolomics to identify biomarkers of astragaloside IV against cerebral ischemic injury in rats
Source: Royal Society of Chemistry journal article supplement (doi:10.1039/d2fo03030f), 2023-01-01
Supplement: d2fo03030f2.xlsx [file d2fo03030f2.xlsx]

## Sheet: Sheet1
Table S2. Down-regulated gene
Uniprot. ID	Entrez	Symbol	Name
A0A0G2JSQ1	113893	Sncb	"synuclein, beta"
A0A0G2K9C5	292732	Numbl	"NUMB-like, endocytic adaptor protein"
A0JPQ3	498136	Mtus2	microtubule associated scaffold protein 2
A9UMV7	690848	Uqcr11	"ubiquinol-cytochrome c reductase, complex III subunit XI"
B0BN18	685607	Pfdn2	prefoldin subunit 2
B2GUZ6	309912	Rtn4ip1	reticulon 4 interacting protein 1
B2RYS2	362897	Uqcrb	ubiquinol-cytochrome c reductase binding protein
B2RZ78	288666	Vps29	VPS29 retromer complex component
B2RZD6	681024	Ndufa4	"NDUFA4, mitochondrial complex associated"
B3DMA0	311209	Tp53i11	tumor protein p53 inducible protein 11
B5DFN1	301068	Eif1b	eukaryotic translation initiation factor 1B
C0HL12	362931	Adgrb1	adhesion G protein-coupled receptor B1
D3Z900	171451	Mtarc2	mitochondrial amidoxime reducing component 2
D3ZA93	291135	Acot13	acyl-CoA thioesterase 13
D3ZAF6	690441	Atp5mf	ATP synthase membrane subunit f
D3ZAS2	288743	Sgsm1	small G protein signaling modulator 1
D3ZC15	307797	Carmil2	capping protein regulator and myosin 1 linker 2
D3ZDH8	116728	Septin5	septin 5
D3ZES2	299075	Trappc6b	trafficking protein particle complex 6B
D3ZF39	498272	Uap1	UDP-N-acetylglucosamine pyrophosphorylase 1
D3ZH36	100910536	Elfn2	extracellular leucine-rich repeat and fibronectin type III domain containing 2
D3ZUQ0	304469	Rilpl1	Rab interacting lysosomal protein-like 1
D3ZVR7	362676	Prxl2b	peroxiredoxin like 2B
D3ZX74	362810	Coq10a	coenzyme Q10A
D3ZYM7	102550385	LOC102550385	LYR motif-containing protein 4-like
D3ZYY0	361044	Sdr39u1	"short chain dehydrogenase/reductase family 39U, member 1"
D4A1G1	364224	Acyp2	acylphosphatase 2
D4A3V2	315167	Ndufa6	NADH:ubiquinone oxidoreductase subunit A6
D4A3X3	298693	Isg15	ISG15 ubiquitin-like modifier
D4A4P3	301427	Ndufb3	NADH:ubiquinone oxidoreductase subunit B3
D4A4T0	287155	Stub1	STIP1 homology and U-box containing protein 1
D4A6X4	299203	Acyp1	acylphosphatase 1
D4A7Q6	361519	Zfp428	zinc finger protein 428
D4A8F3	311151	Dusp19	dual specificity phosphatase 19
D4AAZ9	293996	Pdzd7	PDZ domain containing 7
D4ADD7	362776	Glrx5	glutaredoxin 5
F1LPG5	288088	Ndufb4	NADH:ubiquinone oxidoreductase subunit B4
F1LQY6	170928	Necab2	N-terminal EF-hand calcium binding protein 2
F7EN52	362782	Cyp46a1	"cytochrome P450, family 46, subfamily a, polypeptide 1"
G3V6H0	100126191	Rab1b	"RAB1B, member RAS oncogene family"
G3V6J4	299757	Nts	neurotensin
G3V6J5	314743	Cdk17	cyclin-dependent kinase 17
G3V9G3	24245	Camk2b	calcium/calmodulin-dependent protein kinase II beta
M0R776	294696	Mrps36	mitochondrial ribosomal protein S36
M0R8C5	313535	Eri3	ERI1 exoribonuclease family member 3
M0RBL8	501628	Tceal3	transcription elongation factor A like 3
P02688	24547	Mbp	myelin basic protein
P04775	24766	Scn2a	sodium voltage-gated channel alpha subunit 2
P07483	79131	Fabp3	fatty acid binding protein 3
P09951	24949	Syn1	synapsin I
P10111	100360977	Ppial4d	peptidylprolyl isomerase A (cyclophilin A)-like 4D
P10818	25282	Cox6a1	cytochrome c oxidase subunit 6A1
P12369	24679	Prkar2b	protein kinase cAMP-dependent type II regulatory subunit beta
P13234	25050	Camk4	calcium/calmodulin-dependent protein kinase IV
P13668	29332	Stmn1	stathmin 1
P14056	64363	Araf	"A-Raf proto-oncogene, serine/threonine kinase"
P17425	29637	Hmgcs1	3-hydroxy-3-methylglutaryl-CoA synthase 1
P20171	293621	Hras	"HRas proto-oncogene, GTPase"
P27605	103689983	LOC103689983	hypoxanthine-guanine phosphoribosyltransferase
P37377	29219	Snca	synuclein alpha
P49803	54296	Rgs7	regulator of G-protein signaling 7
P60841	60334	Ensa	endosulfine alpha
P62024	306844	Phactr1	phosphatase and actin regulator 1
P62076	252928	Timm13	translocase of inner mitochondrial membrane 13
P62628	170714	Dynlrb1	dynein light chain roadblock-type 1
P63012	25531	Rab3a	"RAB3A, member RAS oncogene family"
P82995	103692716	LOC103692716	heat shock protein HSP 90-alpha
P84039	316249	Enpp5	ectonucleotide pyrophosphatase/phosphodiesterase family member 5
P84076	29177	Hpca	hippocalcin
P84083	79117	Arf5	ADP-ribosylation factor 5
P97546	56064	Nptn	neuroplastin
Q01066	29691	Pde1b	phosphodiesterase 1B
Q04940	64356	Nrgn	neurogranin
Q06647	192241	Atp5po	ATP synthase peripheral stalk subunit OSCP
Q2KMM2	287427	Trappc1	trafficking protein particle complex 1
Q304F3	296369	Tnnc2	"troponin C2, fast skeletal type"
Q3B7U9	290652	Fkbp8	FKBP prolyl isomerase 8
Q3MIE9	363469	Sms	spermine synthase
Q499Q2	689256	Tpd52l1	TPD52 like 1
Q4V7D2	287061	Rogdi	rogdi atypical leucine zipper
Q505J6	681896	Slc25a18	solute carrier family 25 member 18
Q5BJL8	501550	Trappc2	trafficking protein particle complex 2
Q5BJT9	29593	Ckmt1	"creatine kinase, mitochondrial 1"
Q5MJ12	494223	Fbxl16	F-box and leucine-rich repeat protein 16
Q5PPG6	688843	Nap1l5	nucleosome assembly protein 1-like 5
Q5PQN0	553106	Ncald	neurocalcin delta
Q5RJK8	289125	Acbd6	acyl-CoA binding domain containing 6
Q5XFW1	24547	Mbp	myelin basic protein
Q5XID7	367902	Armcx3	"armadillo repeat containing, X-linked 3"
Q5XIF6	316531	Tuba4a	"tubulin, alpha 4A"
Q5XIG0	305149	Nudt9	nudix hydrolase 9
Q5XIT1	298848	Mapre3	"microtubule-associated protein, RP/EB family, member 3"
Q62609	93667	Olfm1	olfactomedin 1
Q62639	26954	Rheb	"Ras homolog, mTORC1 binding"
Q63092	79011	Camkv	CaM kinase-like vesicle-associated
Q63159	29309	Coq3	coenzyme Q3 methyltransferase
Q63362	25488	Ndufa5	NADH:ubiquinone oxidoreductase subunit A5
Q63941	81755	Rab3b	"RAB3B, member RAS oncogene family"
Q66HR5	100912282	LOC100912282	calcium-binding and coiled-coil domain-containing protein 1-like
Q6AY56	500377	Tuba8	"tubulin, alpha 8"
Q6GMN2	117542	Baiap2	BAR/IMD domain containing adaptor protein 2
Q6J4I0	360616	Ppp1r1b	"protein phosphatase 1, regulatory (inhibitor) subunit 1B"
Q6MG82	406167	Prrt1	proline-rich transmembrane protein 1
Q6QIX3	366568	Slc30a3	solute carrier family 30 member 3
Q6TEK3	103693015	LOC103693015	vitamin K epoxide reductase complex subunit 1-like protein 1
Q7TPB7	362911	Mal2	"mal, T-cell differentiation protein 2"
Q80W96	290985	Isca1	iron-sulfur cluster assembly 1
Q80Z26	316077	Entpd3	ectonucleoside triphosphate diphosphohydrolase 3
Q812E9	306439	Gpm6a	glycoprotein m6a
Q8CHN7	25510	Pcp4	Purkinje cell protein 4
Q9JJW3	103693430	LOC103693430	up-regulated during skeletal muscle growth protein 5
Q9JKM5	60399	S1pr5	sphingosine-1-phosphate receptor 5
Q9JLZ1	58815	Glrx3	glutaredoxin 3
Q9Z252	60377	Lin7b	"lin-7 homolog B, crumbs cell polarity complex component"
