# Supplementary material for: Integrated transcriptomics, proteomics and metabolomics to identify biomarkers of astragaloside IV against cerebral ischemic injury in rats
Source: Royal Society of Chemistry journal article supplement (doi:10.1039/d2fo03030f), 2023-01-01
Supplement: d2fo03030f3.xlsx [file d2fo03030f3.xlsx]

## Sheet:  Differential metabolites
				Table.S3 Differential metabolites
ID	Formula	ratio	t.test_p.value	VIP	Adducts	Score	Mass.Error.ppm.	Isotope.Similarity	Description	m.z	Retention. time.min.
C12144	C18H39NO3	1.31742	0.0116284	1.58362	M+H, M+Na	57.5	-0.0988709	99.4738	Phytosphingosine	318.3	0.773567
C00294	C10H12N4O5	0.462015	9.62889e-08	3.38591	M+Na	56.1	-0.369153	89.4223	Inosine	291.07	0.57375
C00475	C9H13N3O5	0.401024	5.80576e-08	3.67786	M+Na	53.4	-2.3728	87.4393	Cytidine	266.074	0.57375
C19670	C18H35NO	0.662673	0.0203506	2.16595	M+H-H2O	41.7	-0.906889	98.3005	Oleamide	264.268	8.18448
C07313	C8H15N3O7	0.772184	0.0242003	1.50061	M+Na	41.2	2.079	68.4201	Streptozocin	288.081	0.589517
C12512	C24H30O6	1.20723	0.0455332	1.03921	M+NH4	40.9	-0.222177	98.6733	Eplerenone	432.238	0.69855
C13914	C20H41NO2	0.807626	0.0328969	1.25423	M+H	39.9	-0.0370352	99.4755	N,N-Dimethylsphingosine	328.321	2.95817
C02934	C18H37NO2	0.584388	0.000333445	1.99107	M+H, M+Na	39.8	0.428328	99.302	3-Dehydrosphinganine	300.29	1.63037
C15518	C27H46O3	1.24889	0.0107941	1.37426	M+H-H2O	39.8	-0.0218619	98.8203	(24S)-7alpha,24-Dihydroxycholesterol	401.341	2.84233
C06341	C27H46O3	1.24889	0.0107941	1.37426	M+H-H2O	39.8	-0.0218619	98.8203	7-a,27-Dihydroxycholesterol	401.341	2.84233
C13846	C18H37NO	1.63431	0.00341641	1.84287	M+NH4, M+Na, M+H	39.6	-1.17237	99.6314	Octadecanamide	284.295	2.49045
C11285	C19H39NO	0.812009	0.0134541	1.16335	M+H	39.6	0.0901696	97.9108	Tridemorph	298.31	3.33017
C20792	C20H39NO2	0.695544	0.00146991	1.70091	M+H-H2O, M+H	39.4	1.04199	98.0346	N-Oleoylethanolamine	326.305	1.71415
C00611	C14H25NO11	0.706272	0.000977223	1.88888	M+H-H2O	39.4	0.155619	96.976	N-Acetyllactosamine	366.14	5.01388
C01389	C20H40O	0.56644	0.0433296	2.33241	M+NH4	39.2	-0.589758	96.763	Phytol	314.342	1.71415
C13861	C37H70O5	1.21817	0.00509495	1.43953	M+H-H2O	39.1	1.98572	97.9103	DG(16:0/18:1(9Z)/0:0)	577.52	7.7747
C04886	C25H42N2O19	0.746374	0.000989206	1.77654	M+H-H2O	39	2.62142	97.9682	(N-acetylneuraminosyl(a2-6)lactosamine)	657.237	4.35793
C00318	C7H15NO3	0.682385	5.50473e-08	1.84169	M+H	38.8	-3.8686	98.6265	L-Carnitine	162.112	0.566133
C00262	C5H4N4O	0.810656	0.0362202	1.25352	M+H	38.7	-4.07943	98.3077	Hypoxanthine	137.045	0.581467
C07493	C15H14N2O2	1.419	0.0310999	1.40448	M+Na	38.6	3.53507	97.3748	10-Hydroxycarbazepine	277.096	1.84425
C06757	C8H10O	1.33568	0.0439058	1.50347	M+H-H2O	38.1	-3.56495	94.621	4-Methylbenzyl alcohol	105.069	0.690933
C13637	C8H10O	1.33568	0.0439058	1.50347	M+H-H2O	38.1	-3.56495	94.621	4-Ethylphenol	105.069	0.690933
C01948	C15H30O	2.0608	0.0298569	2.21711	M+H-H2O	38.1	-6.10543	97.2917	Pentadecanal	209.225	2.57452
C03527	C13H22O	1.55377	0.0248659	1.76667	M+H-H2O	38	-3.47886	86.572	4-(2,6,6-Trimethyl-1-cyclohexen-1-yl)-2-butanone	177.163	1.84425
C03793	C9H20N2O2	0.821521	0.0121633	1.04898	M+H	37.7	-4.9023	94.1637	N6,N6,N6-Trimethyl-L-lysine	189.159	0.668083
C06861	C21H31N5O2	1.50387	0.00642616	1.7158	M+H-H2O	37.6	6.89171	95.7237	Buspirone	368.247	2.49045
C00331	C11H9NO3	0.83042	0.0422997	1.16309	M+H-H2O	37.4	9.63129	97.5028	Indolepyruvate	186.057	1.63037
C07256	C25H32ClN5O2	1.56637	0.00713638	1.86184	M+H-H2O	37.4	1.51351	88.7208	Nefazodone	452.222	2.58213
C00300	C4H9N3O2	0.768171	0.0196519	1.56287	M+Na	37.1	-9.33578	95.8618	Creatine	154.057	0.581467
C11695	C22H37NO2	1.71839	0.011894	2.01588	M+H-H2O	36.7	-8.83698	93.4469	Anandamide	330.276	2.0582
C07497	C10H19O6PS2	0.724873	0.0143691	1.70131	M+NH4	36.3	-2.55515	84.5112	Malathion	348.069	0.589517
C00881	C9H13N3O4	0.445939	4.70471e-06	3.32176	M+K	36.2	-8.04379	66.8247	Deoxycytidine	266.052	0.613883
C14509	C13H28O	1.23805	0.0338009	1.33889	M+Na, M+K	35.8	3.06799	82.7988	Tridecanol	239.148	1.29515
C13856	C23H38O4	0.797873	0.015817	1.29265	M+H-H2O	35.5	-0.689568	78.4313	2-Arachidonylglycerol	361.273	0.834483
C20198	C10H18N5O19P5	2.60857	0.0241141	2.89524	M+H-H2O	35.3	-9.5418	86.7254	Adenosine 5'-pentaphosphate	649.919	3.30732
C07001	C17H20F6N2O3	1.35747	0.00670355	1.24455	M+H	34.9	5.28849	80.5646	Flecainide	415.147	3.19308
C00482	C11H12O5	0.613628	0.00105829	2.40075	M+Na	32.7	-1.75281	65.7825	Sinapic acid	247.057	0.5351
C14147	C6H10N6	0.657046	0.0182075	1.75389	M+K	32.4	-3.49888	66.0432	Cyromazine	205.059	2.54377
C04524	C14H10O8	0.622152	0.00241039	2.28969	M+K	30.2	-4.06354	49.3319	2-(3,4-Dihydroxybenzoyloxy)-4,6-dihydroxybenzoate	344.999	0.597717
C15976	C16H27N4O8P2S+	0.725871	0.00350709	1.77761	M+H	25.5	0.180446	22.1987	2-Methyl-1-hydroxypropyl-ThPP	498.11	0.589517
C03413	C14H30N4O2	0.671648	4.45875e-06	1.71465	M+H	24.6	8.84823	32.6761	N1,N12-Diacetylspermine	287.247	1.06275
C00634	C14H23NO15S	0.692969	0.0122989	1.80055	M+H-H2O	33.7	7.01344	67.1005	Chondroitin 4-sulfate	460.079	0.597717
C06156	C6H14NO8P	0.566248	0.000196382	2.65954	M+H, M+Na	34.1	2.15955	72.9363	Glucosamine-1P	282.048	0.589517
C00195	C40H79NO3	0.69878	0.0263249	1.85916	M+H-H2O, M+H	39.7	1.66075	96.3494	Ceramide (d18:1/22:0)	604.604	9.00175
C01190	C49H95NO8	0.626223	0.0047698	2.30332	M+H-H2O, M+Na	39	1.12364	89.9343	Glucosylceramide (d18:1/25:0)	848.697	9.17723
C16163	C39H62N7O17P3S	4.18286	0.0244845	3.53861	M+H-H2O	30.5	-9.28422	62.5569	Stearidonoyl CoA	1008.3	9.27753
C02530	C49H76O2	0.465563	0.000431253	2.77849	M+NH4, M+Na, M+H	34.6	1.64562	74.8823	CE(22:6(4Z,7Z,10Z,13Z,16Z,19Z))	719.574	10.4279
C05543	C7H15NO2	0.675104	1.08599e-06	2.35771	M+H	38.1	-5.73936	97.2887	3-Dehydroxycarnitine	146.117	0.566133
C00350	C45H78NO8P	0.693459	0.00509495	1.21335	M+H-H2O, M+H	35.1	2.97684	77.0568	PE(22:4(7Z,10Z,13Z,16Z)/18:2(9Z,12Z))	792.557	9.53633
C04230	C26H54NO7P	0.68768	0.00315351	1.98438	M+H-H2O	38.5	1.08835	93.8031	LysoPC(18:0)	506.361	1.4088
C03082	C4H8NO7P	0.327021	0.00160369	3.26786	M+K	39.7	-0.143381	96.5501	L-Aspartyl-4-phosphate	251.967	0.589517
C00550	C45H85N2O6P	0.785803	0.0280989	1.40098	M+H-H2O	35	-2.37977	72.7259	SM(d18:0/22:3(10Z,13Z,16Z))	763.609	8.77878
C05945	C6H15N4O5P	1.5623	0.0329058	1.78536	M+Na	38	-1.51545	91.9202	L-Phosphoarginine	277.067	1.87473
C13297	C13H22O	1.48888	0.00584524	1.70569	M+NH4	58.5	-2.02615	98.8006	Geranylacetone	212.2	1.84425
C09690	C14H22O	1.56599	0.00610081	1.74987	M+H, M+NH4, M+H-H2O	54.7	-3.76397	97.9534	alpha-Irone	224.2	1.47805
C12139	C43H49O23+	2.86785	0.0297259	2.78746	M+H	32.3	6.63835	69.0146	Petanin	934.28	9.03287
C08409	C12H23NO9S3	0.757417	0.0472635	1.43507	M+Na	32.5	1.28914	45.2617	Glucoerucin	444.043	0.613883
C01796	C4H8O4	6.70375	2.46713e-06	4.61267	M-CH3	45.1	-3.62463	96.2626	Erythrose	105.019	0.549183
C04368	C9H11NO3	1.58846	3.79199e-06	2.0302	M-CH3	47.6	-5.21936	84.4386	Beta-Tyrosine	166.05	0.615283
C16358	C6H6N4O2	1.74548	2.2128e-09	2.55438	M-CH3	46.4	-1.15869	98.6595	1-Methylxanthine	151.026	0.577
C16357	C6H6N4O2	1.74548	2.2128e-09	2.55438	M-CH3	46.4	-1.15869	98.6595	3-Methylxanthine	151.026	0.577
C03906	C5H11O8P	0.264028	2.35898e-11	4.25404	M-CH3, M-H	43	-3.87564	93.9666	Beta-L-arabinose 1-phosphate	228.993	0.56815
C00355	C9H11NO4	1.72437	0.000127966	2.4079	M-CH3, M+Cl	42.2	-4.80882	87.5981	L-Dopa	232.047	0.56815
C03656	C6H11NO3	0.539624	0.000139962	2.31208	M-CH3	41.3	1.94164	99.5184	(S)-5-Amino-3-oxohexanoate	130.051	0.559067
C00433	C5H6O4	0.497465	0.000130421	2.52652	M-CH3	40.1	-2.8841	97.4925	2,5-Dioxopentanoate	115.003	0.559067
C15989	C18H37O7P	1.49808	0.0446037	1.22528	M-CH3, M-H	39.9	-0.994646	96.0183	(9S,10S)-10-hydroxy-9-(phosphonooxy)octadecanoate	395.192	0.751067
C04540	C12H21N3O8	0.689275	0.00172029	1.89107	M-H	39.2	-3.7495	94.9856	Aspartylglycosamine	334.124	0.549183
C02427	C7H15N3O3	1.39614	9.21687e-06	1.56099	M-CH3	39.1	-3.10247	96.9507	Homocitrulline	174.088	0.586383
C01956	C5H5N3O	1.73805	1.62461e-06	2.48665	M-CH3	38.9	-4.04165	99.0883	Pyrazinamide	108.02	0.577
C01089	C4H8O3	0.823092	9.05286e-05	1.41568	M-CH3	38.8	-3.74092	98.508	(R)-3-Hydroxybutyric acid	89.024	0.605717
C05123	C2H6O4S	0.759408	0.00259365	1.50381	M-H	38.4	-7.97004	92.7687	2-Hydroxyethanesulfonate	124.99	0.549183
C02721	C4H9NO2	0.768044	0.00636183	1.33669	M-CH3	38.3	-4.2046	96.3013	N-Methylalanine	88.0399	0.559067
C03878	C8H15NO6	1.59868	2.54371e-06	2.05194	M+Cl	38.1	-5.7569	95.5249	beta-N-Acetylglucosamine	256.058	0.559067
C00489	C5H8O4	2.07676	0.00221729	2.10969	M-CH3	38.1	0.653238	91.2319	Glutaric acid	117.019	0.634567
C08299	C12H16N2O	1.33501	0.00176483	1.35962	M+Cl	38	-1.84135	92.3047	Bufotenin	239.095	1.92273
C03824	C6H7NO3	2.18649	7.19547e-05	2.7666	M-H	37.7	-6.96604	89.3659	2-Aminomuconic acid semialdehyde	140.034	0.559067
C01152	C7H11N3O2	1.65034	0.0169757	2.01919	M-H	37.3	-7.48911	93.1599	3-Methylhistidine	168.077	0.56815
C06429	C22H32O2	1.81699	0.009919	1.61498	M+Cl	37.3	-2.08479	88.9212	Docosahexaenoic acid	363.209	1.82548
C19245	C10H8N4	1.88701	3.25461e-07	2.55795	M+Cl	37	2.65421	86.8384	2-Aminodipyrido[1,2-a:3',2'-d]imidazole	219.045	0.559067
C16536	C17H32O2	2.05749	0.0149448	1.89652	M-CH3	37	-2.35281	87.5643	9E-Heptadecenoic acid	253.217	1.94227
C04823	C13H19N4O12P	8.56435	1.69261e-05	4.48149	M-CH3	36.7	-5.17097	88.0619	SAICAR	439.048	0.549183
C08272	C10H9N5O	1.86917	8.1667e-05	2.54059	M-CH3	36.7	-2.37314	83.7477	Kinetin	200.057	0.559067
C01136	C10H19NO2S2	3.16348	3.08365e-10	3.79762	M-CH3, M-H	36.7	-5.42508	88.6354	S-Acetyldihydrolipoamide	234.061	0.559067
C10759	C22H36O3	2.24657	0.0177915	2.75252	M-H	36.7	-1.57891	85.577	2-Hydroxy-6-pentadecylbenzoic acid	347.259	1.26782
C07020	C15H22O3	2.29014	0.00776719	2.52648	M-CH3, M-H	36.6	-2.38369	85.8712	Gemfibrozil	249.152	1.91303
C10343	C15H10O5	0.327474	2.1812e-12	3.83833	M-H, M+Cl	35.8	-6.15054	85.2516	Emodin	305.012	0.577
C09042	C22H30N2O2	1.2956	0.00337979	1.23097	M-CH3	35.8	-8.31476	88.0444	(-)-Aspidospermine	339.205	2.70133
C16666	C8H11NO2	1.84201	0.00154874	2.33222	M-CH3	35.7	-5.62751	72.9823	Vanillylamine	138.055	0.624867
C03564	C5H7NO2	0.707512	0.000526235	1.67274	M-H	35.6	-3.18028	67.077	1-Pyrroline-2-carboxylic acid	112.04	0.559067
C01127	C5H6O6	1.91111	0.0352765	1.99573	M+Cl	35.2	-7.65881	81.8713	4-Hydroxy-2-oxoglutaric acid	196.985	0.56815
C05946	C5H6O6	1.91111	0.0352765	1.99573	M+Cl	35.2	-7.65881	81.8713	D-4-Hydroxy-2-oxoglutarate	196.985	0.56815
C08005	C21H32N6O3	1.33677	0.00471425	1.20889	M-H	34.6	-5.76454	79.3624	Alfentanil	415.244	1.93245
C00846	C6H8O5	0.740814	0.000102265	1.69011	M-CH3	34.2	-4.71648	68.7064	3-Oxoadipic acid	145.013	0.559067
C00322	C6H8O5	0.740814	0.000102265	1.69011	M-CH3	34.2	-4.71648	68.7064	Oxoadipic acid	145.013	0.559067
C00329	C6H13NO5	4.08776	0.012143	3.86858	M-H	33.6	-4.11187	71.3533	Glucosamine	178.071	0.549183
C07630	C12H14N4O4S	1.32324	0.0372156	1.2527	M+Cl	33.1	-0.867922	57.7697	Sulfadoxine	345.043	0.596017
C07949	C14H11NO5	0.792963	0.0300094	1.08232	M+Cl	33	5.99498	71.9957	Tolcapone	308.035	0.596017
C07045	C21H27ClN2O2	1.91407	7.73552e-05	2.6061	M-H, M+Cl, M-CH3	32.7	7.59787	68.4784	Hydroxyzine	373.172	0.559067
C07041	C7H8ClN3O4S2	0.54714	0.0453673	1.85562	M-H	32	2.2445	61.8782	Hydrochlorothiazide	295.958	0.605717
C07549	C56H78N2O16+2	0.703146	0.000682798	1.78066	M-CH3	31.4	6.55698	64.2078	Doxacurium chloride	1019.52	4.56992
C07037	C9H9Cl2N3O	0.444969	0.000595646	2.43808	M+Cl	29.2	7.60472	54.4651	Guanfacine	279.984	0.596017
C00170	C11H15N5O3S	1.24551	0.00172029	1.41796	M-H	23.5	9.30487	27.8392	5'-Methylthioadenosine	296.085	0.586383
C16265	C6H7NO3	1.6556	9.46431e-06	2.11143	M-CH3, M-H	36.2	-2.02857	75.6744	2-Aminomuconic acid semialdehyde	140.016	0.549183
C05422	C15H18O8	0.248477	3.73158e-12	4.23563	M-CH3, M+Cl	26.8	-8.03638	33.811	Bilobalide A	361.086	0.549183
C06126	C8H15NO6	0.722374	9.21687e-06	1.0453	M+Cl	38.1	-5.7569	95.5249	beta-N-Acetylglucosamine	256.058	0.559067
C04911	H2MoO4+2	0.538354	0.00273983	2.58122	M-H	21	7.56903	13.3276	Molybdate	162.895	0.56815
C06135	C6H6O6	0.653047	0.00237752	1.19881	M-H, M+Cl	38.6	-4.21215	90.9412	Dehydroascorbic acid	173.008	0.577
C05401	C8H15NO6	1.29323	0.000101799	1.67322	M-H	37	-3.86587	85.7286	beta-N-Acetylglucosamine	220.082	0.586383
C05655	C14H16N2O8	2.11366	1.87005e-08	2.961	M-CH3	44.4	-6.99346	91.8305	Vulgaxanthin II	325.065	0.605717
C00157	C23H38O6	0.754994	0.00113102	1.42885	M-CH3	44.9	-2.00954	93.379	PGF2alpha-11-acetate methyl ester	395.243	0.751067
C00626	C22H42O7	0.765259	0.0017693	1.5113	M-CH3, M+Cl	37.4	0.805337	87.8878	Palmitoyl glucuronide	403.27	1.91303
C03033	C12H16N2O	1.60919	0.0305786	1.46935	M+Cl	38	-1.84135	92.3047	Bufotenin	239.095	1.92273
C06232	C23H38O6	0.675546	0.000635352	1.98148	M-CH3	39.9	-1.15275	91.8435	PGF2alpha-11-acetate methyl ester	395.243	1.94227
C08569	C12H16N2O	0.799781	0.0469347	1.21552	M+Cl	37.7	-2.32417	91.0307	Bufotenin	239.095	2.70133
C09709	C48H74NO10P	1.20934	0.0291186	1.19571	M-H	36.9	-0.402747	85.1445	PS(22:5(7Z,10Z,13Z,16Z,19Z)/20:5(5Z,8Z,11Z,14Z,17Z))	854.497	3.80595
C07605	C44H75O10P	1.3066	0.015947	1.30148	M-H	31.8	-1.01367	60.2995	PG(16:0/22:6(4Z,7Z,10Z,13Z,16Z,19Z))	793.502	4.35158
C02686	C40H77NO8	1.17033	0.0143288	0.841276	M-H, M+Cl	45.6	-5.79187	81.0512	Galactosylceramide (d18:1/16:0)	734.533	6.35578
